# Supplementary material
Source: PubMed Central journal article supplement (PMC30238)
Supplement: pnas_051618398_3.pdf [file pnas_051618398_3.pdf]

**Table 2.** Oligonucleotides for construction of chimeric and truncated  $\epsilon$ -cyclases and site-directed mutants

| Construct               | Primer name and junction  | Primer sequence*                                       |
|-------------------------|---------------------------|--------------------------------------------------------|
| Lse/Ste 262/108         | (none) ELGG/PRVS          | Used conserved <i>Ava</i> II sites                     |
| Lse/Ste 285/6           | (none) YDPD/LGLQ          | Used <i>Bgl</i> III sites                              |
| Lse/Ate 323/320         | Lse323N KIFF/EETC         | cgaagaatattttgttgagaca                                 |
|                         | Ate324C                   | aggagacatgtttggcctcaa                                  |
| Lse/Ate 443/435         | Lse443N WPLE/RKRQ         | ttcaagtggccacaatgtttc                                  |
|                         | Ate444C                   | aggaaaagacagagagcattctt                                |
| Lse/Ate 461/453         | Lse461N IVLM/DTEG         | attagcacgatgtgatagtc                                   |
|                         | Ate462C                   | ggataccgaaggcattagaag                                  |
| Lse/Ate 498/490         | Lse498N IIFA/LYMF         | gcaaatattatcaaatccgttgaaga                             |
|                         | Ate499C                   | ttatacatgttcgctattcaccaaa                              |
| Ate/Lse 390/395         | Ate394N ATGY/SVVR         | tagcctgttgcgggatga                                     |
|                         | Lse395C                   | ttcagttgttcgatctttgtcag                                |
| Ate/Lse 408/413         | AteN412 VIAE/ILRQ         | tctgcatgactgatgcatatt                                  |
|                         | LseC314 (typo by vendor)  | gattttaagacaagatcaatctaaagagatg                        |
| Ate/Lse 420/430         | AteN429 QINS/NISK         | ctgttgatctgtttgtagtctcttc                              |
|                         | LseC430                   | taacattcaaaaacaagcatgggaaa                             |
| Ate/Lse 440/450         | AteN449 RQRA/FFLF         | atgctctctgtcttttcttctg                                 |
|                         | LseC450                   | tctttctattcggactatcacacac                              |
| Ate/Lse 455/465         | AteN464 FDTE/GTRT         | cttcggatcgaattgaactatgag                               |
|                         | LseC465                   | gaacacgtacattttccgactttc                               |
| Ate                     | (none)                    | Full length cDNA in pBluescript SK-; not a lacZ fusion |
| Ate $\Delta$ 11N        | EPS- $\Delta$ 11 (NcoI)   | caAcCatggcggttcaacatttc                                |
| Ate $\Delta$ 58N        | EPS- $\Delta$ 59 (NcoI)   | tgtgCCATggtgagagaagattcgtgac                           |
| Ate $\Delta$ 82N        | EPS- $\Delta$ 82 (NcoI)   | ttcCCatgGagcagaacaaagataggatga                         |
| Ate $\Delta$ 88N        | EPS- $\Delta$ 88 (NcoI)   | aagCCatggatgaacagtctaagcttgtg                          |
| Ate $\Delta$ 103N       | (none)                    | Used MunI/mung bean + fused to NcoI/Klenow of pTrcHisA |
| Ate $\Delta$ 23C        | Ate/K511tag (=taa)        | gatgattgatgagaccttAtctcaattgttggg                      |
| Ate ALIVQF447-52/SHIVLM | Ate/456-61SHIVLM (DraIII) | gccttcgggtatcCaTtAgCacGatgTgtgAaagaccaagag             |
| Ate L448H               | AteL457H/FspI             | ggtatcgaattgaactatgTgCgcaagaccaagagaaag                |
| Ate L448D               | AteL457D/EcoRV            | ggtatcgaattgaacGatATCtcaagaccaagagaaag                 |
| Ate L448R               | AteL457R/BssHII           | ggtatcgaattgaactatgCgCgcaagaccaagagaaag                |
| Ate A447D               | AteA456D/BglII            | cgaattgaactatgagATcTagaccaagagaaagaaatgc               |
| Lse                     | (none)                    | Full length cDNA in pBluescript SK-; not a lacZ fusion |
| Lse $\Delta$ 92N        | (none)                    | Used pre-existing NcoI; fusion in TrcHisA              |

|           |                |                                                                 |
|-----------|----------------|-----------------------------------------------------------------|
| Lse Δ107N | (none)         | Used MunI/mung bean + fused to NcoI/Klenow of pTrcHisA          |
| Lse Δ23C  | Lse/M511tag    | atgtctaaccagttcc <u>TA</u> tctcaagetgtgaggtgc                   |
| Lse H457L | Lse/H457L      | ccctctagatccattagcacgatg <b>A</b> gtgatagtcggaatagaag           |
| Lse H457D | LseH457D/EcoRV | cctctagatccattagcacgat <b>AtC</b> tgatagtcggaatagaag            |
| Lse H457R | Lse/H457R/XhoI | ctagatccattagcacgat <b>TCTC</b> ga <b>G</b> agtccggaatagaagaagg |
| Lse L460Q | Lse/L460Q      | gtccctctagatccatt <b>T</b> gcacgatgtgtgatag                     |

\* Bases altered or introduced by primers are in bold uppercase letters. Restriction enzyme sites introduced by primers are underlined.
